## ■ CORRESPONDENCE

Anesthesiology  
81:778, 1994  
© 1994 American Society of Anesthesiologists, Inc.  
J. B. Lippincott Company, Philadelphia

### Isoflurane-induced Coronary Vasodilation

*To the Editor:*—Recently, Hickey *et al.*<sup>1</sup> demonstrated that isoflurane was, as we had shown earlier,<sup>2</sup> a concentration-dependent coronary vasodilator, but that the vasodilator potency of isoflurane was much smaller than we had found.

Hickey *et al.* state that a goal of their study was "to confirm the provocative results of Crystal *et al.*" Their statement is misleading because they chose a different species (swine *vs.* dog) and a different protocol to introduce isoflurane into the coronary circulation than we used. Each of these factors could have contributed to the difference in results. However, it is difficult to imagine how a species difference alone could have accounted for the much attenuated isoflurane-induced coronary vasodilation in the study of Hickey *et al.* A more critical difference between the studies relates to the protocol used to deliver isoflurane into the coronary circulation. Although Hickey *et al.* used, as we had, an extracorporeal system equipped with an oxygenator to selectively expose a coronary artery to isoflurane, they raised isoflurane concentration in the coronary arterial blood gradually, whereas we exposed the coronary circulation abruptly to blood that had been previously equilibrated with isoflurane. Recent findings from Kenny *et al.*<sup>3</sup> and from our laboratory<sup>4</sup> demonstrated that the coronary circulation adapts to the vasodilator effects of isoflurane over time. If this mechanism were operating during the period that isoflurane concentration was rising gradually in the blood, it could explain the blunted coronary vasodilation observed in the steady-state by Hickey *et al.* It is noteworthy that in all of the *in vivo* studies cited by Hickey *et al.* to support their findings (including one from our laboratory<sup>5</sup>), isoflurane concentration in the arterial blood also increased gradually in accordance with its pharmacokinetics in the alveoli and pulmonary capillary bed.

The findings to date suggest that the reduction in coronary vascular tone by isoflurane is not simply a function of its blood concentration but is also dependent on the rapidity with which this blood concen-

tration is achieved and on the duration that the coronary circulation is exposed to isoflurane.

**George J. Crystal, Ph.D.**  
Associate Professor  
Departments of Anesthesiology and of  
Physiology and Biophysics  
University of Illinois College of Medicine  
Illinois Masonic Medical Center  
836 West Wellington Avenue  
Chicago, Illinois 60657

#### References

1. Hickey RF, Cason BA, Shubayev I: Regional vasodilating properties of isoflurane in normal swine myocardium. *ANESTHESIOLOGY* 80: 574–581, 1994
2. Crystal GJ, Kim S-J, Czinn EA, Salem MR, Mason WR, Abdel-Latif M: Intracoronary isoflurane causes marked vasodilation in canine hearts. *ANESTHESIOLOGY* 74:757–765, 1991
3. Kenny D, Proctor LT, Schmeling WT, Kampine JP, Warltier DC: Isoflurane causes only minimal increases in coronary blood flow independent of oxygen demand. *ANESTHESIOLOGY* 75:640–649, 1991
4. Crystal GJ, Kim S-J, Salem MR, Abdel-Latif M: Time-dependent recovery of coronary vasomotor tone during exposure to isoflurane in dogs (abstract). *Anesth Analg* 74:S60, 1992
5. Abdel-Latif M, Kim S-J, Salem MR, Crystal GJ: Phenylephrine does not limit myocardial blood flow or oxygen delivery during isoflurane-induced hypotension in dogs. *Anesth Analg* 74:870–876, 1992

(Accepted for publication May 15, 1994.)

Anesthesiology  
81:778–779, 1994  
© 1994 American Society of Anesthesiologists, Inc.  
J. B. Lippincott Company, Philadelphia

*In Reply:*—Crystal is correct in his assertion that, if we wanted to exactly duplicate his work, we should have used dogs as our experimental animal and should have selectively perfused a coronary artery with blood already equilibrated with isoflurane as he did in his work.<sup>1</sup> Instead, we conducted our studies in swine, an animal model with a coronary circulation somewhat similar to humans, and we used a membrane oxygenator, which more closely resembles the normal lung with regard to uptake of a volatile anesthetic.

We agree with Crystal and also speculated in our discussion that one of the reasons for the differences in findings between the two studies was the abrupt exposure to isoflurane employed by Crystal *et al.*

It is difficult for us to believe, however, that duration of administration of isoflurane in our study led to a blunted vasodilator response. As stated in our article, we administered isoflurane for 15 min, and coronary blood flow was constant over the last 5 min of this 15-min period. Crystal *et al.*'s work supports our belief that duration of administration did not play a role in our findings, because he reported that at 15 min isoflurane, vasodilation is at a maximum and only begins to decay thereafter.<sup>2</sup>

In summary, Crystal *et al.* exposed coronary arteries to blood pre-equilibrated with isoflurane and found that, under these unique conditions, isoflurane caused a near-maximum vasodilation. This is an important finding that, when explored further, may provide insight

## CORRESPONDENCE

into possible mechanisms of anesthetic-induced vasodilation. On the other hand, we used a method of administration in which isoflurane concentrations were changed over minutes (not seconds) and which is more akin to the clinical use of isoflurane. Thus, under conditions similar to those occurring clinically, we would characterize isoflurane as a mild dose-dependent vasodilator.

**Robert F. Hickey, M.D.**  
Professor of Anesthesia  
Anesthesia Clinical Director  
Moffitt/Long Hospitals  
Vice Chairman, Department of Anesthesia

**Brian A. Cason, M.D.**  
Associate Professor, Anesthesia  
Chief of Service, VAMC  
Vice Chairman, Department of Anesthesia

Anesthesiology  
81:779-780, 1994  
© 1994 American Society of Anesthesiologists, Inc.  
J. B. Lippincott Company, Philadelphia

## Measurement of Carbon Dioxide at Both Nares and Mouth Using Standard Nasal Cannula

*To the Editor:*—The nasal cannula commonly serves a dual purpose in the setting of monitored anesthetic care. In addition to allowing the delivery of supplemental oxygen, the cannula can be used as a carbon dioxide sampling site for the monitoring of respiratory rate and rhythm.

When asleep or sedated, many patients breathe orally. While these patients continue to receive the benefits of supplemental oxygen because of the entrainment of oxygen from the nasopharynx, expired carbon dioxide is not measured at the nares. Commercially produced

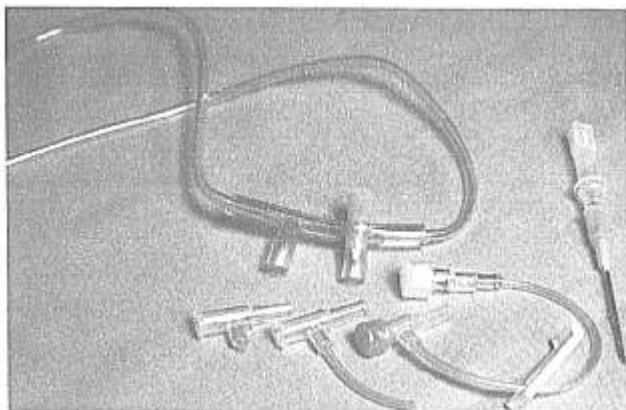

**Fig. 1. Required equipment.**

Department of Anesthesia  
University of California, San Francisco  
and  
Anesthesiology Service (129)  
VA Medical Center  
4150 Clement Street  
San Francisco, California 94121

### References

1. Crystal GJ, Kim S-J, Czinn EA, Salem MR, Mason WR, Abdel-Latif M: Intracoronary isoflurane causes marked vasodilatation in canine hearts. *ANESTHESIOLOGY* 74:757-765, 1991
2. Crystal GJ, Kim S-J, Salem MR, Abdel-Latif M: Time-dependent recovery of coronary vasomotor tone during exposure to isoflurane in dogs (abstract). *Anesth Analg* 74:S60, 1992

(Accepted for publication May 15, 1994.)

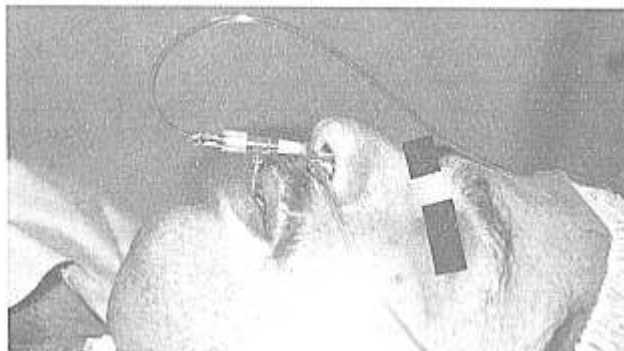

**Fig. 2. Equipment in place.**

nasal cannulas offer the ability to measure carbon dioxide at both the nares and the mouth, but these cannulas may not be readily available or cost-effective.

Taking a standard nasal cannula, a 14- or 16-G angiocatheter, and pediatric "T-piece" intravenous tubing, we fabricated a simple device to measure nasal and oral carbon dioxide. After removing the catheter from the needle, it is cut off the hub and replaced onto the needle. This needle assembly is inserted into the nasal cannula as shown in figure 1, and the needle is removed, leaving the hub in place. The rubber end is removed from the pediatric T-tubing and the carbon
